# Supplementary material for: Association between Exposure to Earthquake in Early Life and Risk of Diabetes Mellitus in Adulthood: Results from the Kailuan Study
Source: Research Square preprint supplement (doi:10.21203/rs.3.rs-1304344/v1), 2022-02-10
Supplement: Supplementary file 1 [file 7702e7bc1c35a3c11e5f078c.docx]

SUPPLEMENTARY APPENDIX

**Association between Exposure to Earthquake in Early Life and Risk of Diabetes Mellitus in Adulthood: Results from the Kailuan Study**

Xinying Shui1,2,3#, Lei Zhao1,2,3#, Wenli Li1,2,3#, Yaning Jia1,2,3, Ziquan Liu1,2,3, Chen Li4, Xueli Yang4, Shouling Wu5, Shuohua Chen5, Jingli Gao6, Xiaolan Li6, Aitian Wang6, Liqiong Guo1,2,3*, Shike Hou1,2,3*

1Wenzhou Safety (Emergency) Institute, Tianjin University, Wenzhou, China;

2Institute of Disaster and Emergency Medicine, Tianjin University Tianjin, China;

3Tianjin Key Laboratory of Disaster Medicine Technology, Tianjin, China;

4Department of Occupational & Environmental Health, School of Public Health, Tianjin Medical University, Tianjin, China;

5Cardiology, Kailuan General Hospital, Tangshan, Heibei, China;

6Department of Intensive medicine, Kailuan General Hospital, Tangshan, Hebei, China;

#These authors contributed equally to this work

***Corresponding author**:

Guo Liqiong: Institute of Disaster and Emergency Medicine, Tianjin University Tianjin 300072, China, Email: [yingqidao@163.com](mailto:yingqidao@163.com);

Hou Shike: Institute of Disaster and Emergency Medicine, Tianjin University Tianjin 300072, China, Email: [houshike@126.com](mailto:houshike@126.com),

**Table S1.** Baseline characteristics of participants included and excluded due to missing information of birth places in the study

|  | Missing information of birth places | |
| --- | --- | --- |
| Yes | No |
| Participates, n (%) | 1417 (15.77) | 7568 (84.23) |
| Age at survey (±s, year) | 34.5± 3.4 | 33.6±4.1 |
| Male, n (%) | 920 (64.93) | 6111 (80.75) |
| Smoking (%) | 535 (37.76) | 3180 (42.02) |
| Drinking (%) | 719 (50.74) | 4228 (55.87) |
| Regular physical exercise, n (%) | 154 (10.87) | 891 (11.77) |
| High education level, n (%) | 809 (57.09) | 3782 (49.97) |
| Body mass index (±s, kg/m2) | 24.5± 3.8 | 24.6±3.7 |
| Systolic pressure (±s, mmHg） | 117.5±15.1 | 121.6±15.5 |
| Diastolic pressure (±s, mmHg） | 78.2±10.6 | 79.6±10.1 |
| Total cholesterol (±s, mmol/L) | 4.7± 1.0 | 4.7± 1.1 |
| Triglycerides (IQR, mmol/L) † | 1.2 (0.8,2.0) | 1.2 (0.8,1.9) |
| Low-density lipoprotein (±s, mmol/L) | 2.5± 0.8 | 2.5±0.8 |
| High-density lipoprotein (±s, mmol/L) | 1.4± 0.4 | 1.5± 0.4 |

| *Data are presented as mean±SD or percentage.  †IQR denotes interquartile range. |
| --- |
